# Supplementary material for: Evaluation of Metabolic and Cardiovascular Risk Measured by Laboratory Biomarkers and Cardiopulmonary Exercise Test in Children and Adolescents Recovered from Brain Tumors: The CARMEP Study
Source: MDPI journal article supplement (doi:10.3390/cancers16020324), 2024-01-11
Supplement: s1 [file s1]

**Table S1.** Correlation between CPET results and cancer treatment.

| Variables      |   | Age at diagnosis (years) | Lenght of FU (years) | Total brain RT (Gy) | Lenght ST (months) | Total CB (mg/mq) | Total CIS (mg/mq) | Total IFO (mg/mq) | Total CP (mg/mq) |
|----------------|---|--------------------------|----------------------|---------------------|--------------------|------------------|-------------------|-------------------|------------------|
| VO2 picco (ml) | r | 0,129                    | 0,22                 | -0,383              | -0,638             | -0,567           | -0,168            | -0,093            | 0,372            |
|                | p | 0,836                    | 0,722                | 0,525               | 0,247              | 0,319            | 0,787             | 0,882             | 0,538            |
| VO2 pro kg     | r | 0,122                    | 0,165                | -0,483              | -0,703             | -0,511           | -0,304            | -0,23             | 0,358            |
|                | p | 0,845                    | 0,791                | 0,41                | 0,186              | 0,379            | 0,619             | 0,71              | 0,554            |
| VO2 %          | r | 0,141                    | 0,183                | -0,464              | -0,704             | -0,504           | -0,256            | -0,191            | 0,336            |
|                | p | 0,821                    | 0,768                | 0,431               | 0,184              | 0,387            | 0,677             | 0,759             | 0,58             |
| VO2@AT         | r | 0,132                    | 0,264                | -0,244              | -0,507             | -0,644           | 0,008             | 0,092             | 0,386            |
|                | p | 0,833                    | 0,667                | 0,693               | 0,384              | 0,24             | 0,99              | 0,884             | 0,521            |
| OUES           | r | -0,788                   | 0,651                | 0,401               | -0,272             | -0,281           | -0,482            | -0,387            | 0,998*           |
|                | p | 0,113                    | 0,234                | 0,503               | 0,659              | 0,648            | 0,411             | 0,52              | <0,0001*         |
| OUES%          | r | 0,086                    | 0,336                | -0,21               | -0,571             | -0,571           | -0,015            | 0,048             | 0,4              |
|                | p | 0,89                     | 0,581                | 0,735               | 0,315              | 0,315            | 0,981             | 0,938             | 0,505            |
| VO2/HR         | r | 0,114                    | 0,287                | -0,273              | -0,584             | -0,584           | -0,053            | 0,016             | 0,384            |
|                | p | 0,855                    | 0,64                 | 0,657               | 0,301              | 0,301            | 0,932             | 0,979             | 0,524            |
| VO2/HR%        | r | 0,072                    | 0,27                 | -0,331              | -0,638             | -0,564           | -0,18             | -0,104            | 0,425            |
|                | p | 0,909                    | 0,661                | 0,586               | 0,247              | 0,322            | 0,772             | 0,867             | 0,476            |
| DVO2/WR slope  | r | -0,073                   | 0,121                | -0,299              | -0,366             | -0,766           | -0,331            | -0,159            | 0,627            |
|                | p | 0,907                    | 0,846                | 0,625               | 0,545              | 0,131            | 0,587             | 0,799             | 0,258            |
| VE/VCO2 slope  | r | 0,458                    | -0,424               | -0,113              | 0,269              | 0,622            | 0,356             | 0,201             | -0,889*          |
|                | p | 0,438                    | 0,477                | 0,856               | 0,662              | 0,263            | 0,557             | 0,745             | 0,044*           |
| BR             | r | -0,787                   | 0,487                | 0,882*              | 0,443              | 0,15             | -0,006            | 0,013             | 0,567            |
|                | p | 0,114                    | 0,405                | 0,048*              | 0,455              | 0,809            | 0,993             | 0,984             | 0,319            |
| FR picco       | r | 0,469                    | -0,438               | -0,75               | -0,456             | 0,415            | -0,331            | -0,43             | -0,604           |
|                | p | 0,426                    | 0,46                 | 0,144               | 0,44               | 0,487            | 0,587             | 0,47              | 0,281            |
| VE picco       | r | 0,451                    | -0,079               | -0,728              | -0,756             | -0,225           | -0,209            | -0,217            | -0,124           |
|                | p | 0,446                    | 0,9                  | 0,163               | 0,139              | 0,716            | 0,736             | 0,726             | 0,843            |
| PCP            | r | -0,066                   | 0,363                | -0,206              | -0,597             | -0,58            | -0,208            | -0,12             | 0,558            |
|                | p | 0,916                    | 0,548                | 0,74                | 0,287              | 0,306            | 0,737             | 0,848             | 0,328            |

AT: Anaerobic Threshold; BR: breathing reserve; CB: carboplatin; CIS: cisplatin; CP: cyclophosphamide; FR: frequency rate; FU: follow up; HR: hearth rate; IFO: ifosfamide; OUES: oxygen uptake efficiency slope; PCP: Peak Circulatory Power; RT: radiation therapy; ST: steroid therapy; VE: ventilation rate; VE/VCO2: minute ventilation/carbon dioxide production; VO2: pulmonary oxygen uptake; WR: work rate.

**Table S2.** Correlation between metabolic and cardiovasclar biomarkers and cancer treatment.

| Variables      |   | Age at diagnosis (years) | Lenght of FU (years) | Total brain RT (Gy) | Lenght ST (months) | Total CB (mg/mq) | Total CIS (mg/mq) | Total IFO (mg/mq) | Total CP (mg/mq) |
|----------------|---|--------------------------|----------------------|---------------------|--------------------|------------------|-------------------|-------------------|------------------|
| Lp(a) (mg/dl)  | r | 0,604                    | -0,778               | -0,975*             | -0,152             | -0,305           | -0,359            | -0,261            | -0,362           |
|                | p | 0,28                     | 0,121                | 0,005*              | 0,807              | 0,617            | 0,553             | 0,672             | 0,549            |
| ApoB (mg/dl)   | r | 0,866                    | -0,453               | -0,289              | 0,308              | -0,449           | 0,826             | 0,849             | -0,634           |
|                | p | 0,057                    | 0,443                | 0,637               | 0,615              | 0,449            | 0,085             | 0,069             | 0,251            |
| Leptin (ng/ml) | r | 0,35                     | -0,683               | -0,173              | 0,578              | 0,381            | 0,143             | 0,105             | -0,707           |
|                | p | 0,563                    | 0,203                | 0,781               | 0,307              | 0,527            | 0,819             | 0,866             | 0,182            |
|                | r | -0,594                   | 0,261                | -0,181              | -0,593             | 0,194            | -0,99*            | -0,967*           | 0,593            |

|                         |   |       |        |        |        |        |        |        |        |
|-------------------------|---|-------|--------|--------|--------|--------|--------|--------|--------|
| TNF $\alpha$<br>(pg/ml) | p | 0,291 | 0,671  | 0,77   | 0,292  | 0,755  | 0,001* | 0,007* | 0,292  |
| IL-1 $\beta$<br>(pg/ml) | r | 0,39  | 0,283  | -0,009 | -0,424 | 0,234  | 0,515  | 0,346  | -0,424 |
|                         | p | 0,516 | 0,645  | 0,989  | 0,477  | 0,704  | 0,375  | 0,569  | 0,477  |
| IL-10<br>(pg/ml)        | r | 0,167 | -0,019 | 0,568  | 0,767  | -0,21  | 0,891* | 0,905* | -0,21  |
|                         | p | 0,788 | 0,976  | 0,318  | 0,13   | 0,735  | 0,042* | 0,034* | 0,735  |
| IL-6<br>(pg/ml)         | r | 0,1   | -0,518 | 0,177  | 0,959* | -0,386 | 0,32   | 0,471  | -0,081 |
|                         | p | 0,872 | 0,371  | 0,776  | 0,01*  | 0,522  | 0,6    | 0,423  | 0,897  |
| ET-1<br>(pg/ml)         | r | 0,427 | -0,547 | -0,877 | -0,426 | 0,18   | -0,515 | -0,534 | -0,426 |
|                         | p | 0,473 | 0,34   | 0,051  | 0,474  | 0,772  | 0,374  | 0,354  | 0,474  |
| AN<br>( $\mu$ g/ml)     | r | 0,512 | 0,097  | -0,167 | -0,232 | -0,5   | 0,564  | 0,573  | -0,135 |
|                         | p | 0,378 | 0,877  | 0,788  | 0,708  | 0,391  | 0,322  | 0,313  | 0,829  |

AN: adiponectin; Apo: apolipoprotein; CB: carboplatin; CIS: cisplatin; CP: cyclophosphamide; ET: endothelin; FU: follow up; IFO: ifosfamide; IL: interleuchin; Lp: lipoprotein; RT: radiation therapy; ST: steroid therapy; TNF: tumor necrosis factor.
